# Supplementary material for: Increased dosage of AOX1 promoter-regulated expression cassettes leads to transcription attenuation of the methanol metabolism in Pichia pastoris
Source: PubMed Central journal article supplement (PMC5353721; doi:10.1038/srep44302), 2017-03-15
Supplement: srep44302-s1.pdf [file srep44302-s1.pdf]

**Increased dosage of *AOX1* promoter-regulated expression cassettes leads to transcription attenuation of the methanol metabolism in *Pichia pastoris***

Elena Cámara<sup>1</sup>, Nils Landes<sup>2,3</sup>, Joan Albiol<sup>1</sup>, Brigitte Gasser<sup>2,3</sup>, Diethard Mattanovich<sup>2,3</sup>, Pau Ferrer<sup>1\*</sup>

<sup>1</sup>Department of Chemical, Biological, and Environmental Engineering, Escola d'Enginyeria, Universitat Autònoma de Barcelona, Bellaterra (Cerdanyola del Vallès) 08193, Catalonia, Spain;

<sup>2</sup>Department of Biotechnology, BOKU - University of Natural Resources and Life Sciences Vienna, Muthgasse 18, 1190 Vienna, Austria

<sup>3</sup>Austrian Centre of Industrial Biotechnology, A-1190 Vienna, Austria

\*Corresponding author: [pau.ferrer@uab.cat](mailto:pau.ferrer@uab.cat)

**Supplementary Table S1. Primer sequences used for ddPCR.** T<sub>m</sub>, melting temperature; %GC, guanosine + cytosine content (in %) of the oligonucleotides.

| <b>OLIGONUCLEOTIDE</b> | <b>SEQUENCE</b>                | <b>T<sub>m</sub></b> | <b>% GC</b> | <b>AMPLICON SIZE (bp)</b> |
|------------------------|--------------------------------|----------------------|-------------|---------------------------|
| <i>ROL</i> fwd primer  | 5' – AAGTGGGACTGTGTCCAATG – 3' | 61                   | 50          | 158                       |
| <i>ROL</i> rev primer  | 5' – GCACTTCTGAAGGAGTTG – 3'   | 57                   | 50          |                           |
| <i>ACT1</i> fwd primer | 5' – CACCACACCTTCTACAAC – 3'   | 56                   | 50          | 139                       |
| <i>ACT1</i> rev primer | 5' – AGAAGGCTGGAACGTTG – 3'    | 58                   | 52          |                           |

**Supplementary Table S3. Additional physiological parameters**

|            | Lipase activity<br>(UA/mL) | OD <sub>600</sub> | Biomass (mmol g <sup>-1</sup><br>DCW h <sup>-1</sup> ) | Y <sub>x/s</sub><br>(g biomass<br>g <sup>-1</sup> substrate) | Respiratory<br>Quotient<br>(RQ) |
|------------|----------------------------|-------------------|--------------------------------------------------------|--------------------------------------------------------------|---------------------------------|
| <b>0C</b>  | n.d.                       | 55.44 ± 2.14      | 3.32 ± 0.13                                            | 0.56 ± 0.01                                                  | 0.57 ± 0.05                     |
| <b>1C</b>  | 626.9 ± 139.0              | 52.44 ± 1.71      | 3.44 ± 0.17                                            | 0.58 ± 0.02                                                  | 0.59 ± 0.03                     |
| <b>2C</b>  | 3922.3 ± 376.1             | 41.22 ± 1.58      | 3.65 ± 0.04                                            | 0.61 ± 0.01                                                  | 0.55 ± 0.01                     |
| <b>4C</b>  | 3368.3 ± 329.2             | 37.11 ± 0.69      | 3.50 ± 0.18                                            | 0.65 ± 0.03                                                  | 0.54 ± 0.03                     |
| <b>8C</b>  | 1831.5 ± 153.6             | 36.67 ± 0.33      | 3.75 ± 0.12                                            | 0.64 ± 0.00                                                  | 0.53 ± 0.03                     |
| <b>15C</b> | 1455.1 ± 66.8              | 36.78 ± 0.51      | 3.87 ± 0.11                                            | 0.63 ± 0.03                                                  | 0.54 ± 0.03                     |

**Supplementary Table S4. Rol content quantification.** Data are shown as means  $\pm$  standard deviation based on triplicate measurements (one for each chemostat performed). \* $P < 0.05$  (compared to reference strain in the case of protein content, compared to the single copy strain in the rest of cases). SN, supernatant; IF, insoluble fraction; SF, soluble fraction.

|     | <b>SN protein content</b><br>(mg protein/g DCW) | <b>SN Rol content</b><br>( $\mu\text{g Rol/g DCW}$ ) | <b>IF Rol content</b><br>( $\mu\text{g Rol/g DCW}$ ) | <b>SN Lipase specific activity</b><br>(UA/ $\mu\text{g Rol}$ ) | <b>SF Lipase specific activity</b><br>(UA/mg protein) |
|-----|-------------------------------------------------|------------------------------------------------------|------------------------------------------------------|----------------------------------------------------------------|-------------------------------------------------------|
| 0C  | 1.74 $\pm$ 0.41                                 | -                                                    | -                                                    | -                                                              | -                                                     |
| 1C  | 1.70 $\pm$ 0.03                                 | 24.16 $\pm$ 13.13                                    | 14.93 $\pm$ 3.65                                     | 29.08 $\pm$ 10.18                                              | 0.09 $\pm$ 0.03                                       |
| 2C  | 2.56 $\pm$ 0.19 *                               | 175.20 $\pm$ 18.90 *                                 | 76.01 $\pm$ 10.83 *                                  | 22.64 $\pm$ 3.91                                               | 0.29 $\pm$ 0.05 *                                     |
| 4C  | 2.69 $\pm$ 0.08 *                               | 146.86 $\pm$ 29.38 *                                 | 63.33 $\pm$ 17.05 *                                  | 23.62 $\pm$ 5.90                                               | 0.30 $\pm$ 0.07 *                                     |
| 8C  | 2.24 $\pm$ 0.11 *                               | 52.54 $\pm$ 7.66 *                                   | 35.29 $\pm$ 9.69 *                                   | 28.93 $\pm$ 2.97                                               | 0.23 $\pm$ 0.05 *                                     |
| 15C | 2.29 $\pm$ 0.08 *                               | 97.00 $\pm$ 3.03 *                                   | 58.55 $\pm$ 13.39 *                                  | 18.35 $\pm$ 2.64                                               | 0.27 $\pm$ 0.03 *                                     |

**Supplementary Table S9. Total fatty acid composition of Rol-producing and reference strains.**

Fatty acid content was quantified by gas chromatography coupled with mass spectrometry. Only the 5 main fatty acids detected are represented. Data are shown as means  $\pm$  standard deviation based on three independent experiments for each strain. \* indicates  $P < 0.05$  compared to 0C.

|     | % oleic acid<br>(C18:1) | % linoleic<br>(C18:2n-6) | % palmitic<br>(C16:0) | % $\alpha$ -linolenic<br>(C18:3n-3) | %stearic<br>(C18:0) | TOTAL<br>( $\mu\text{g FA/mg}$<br>DCW) |
|-----|-------------------------|--------------------------|-----------------------|-------------------------------------|---------------------|----------------------------------------|
| 0C  | 35.3 $\pm$ 3.7          | 26.9 $\pm$ 2.6           | 13.6 $\pm$ 1.3        | 10.8 $\pm$ 0.1                      | 2.1 $\pm$ 0.1       | 45.9 $\pm$ 4.2                         |
| 1C  | 28.2 $\pm$ 1.9 *        | 31.6 $\pm$ 2.1 *         | 11.9 $\pm$ 0.9 *      | 12.9 $\pm$ 0.1 *                    | 1.6 $\pm$ 0.4       | 40.1 $\pm$ 2.9                         |
| 2C  | 28.4 $\pm$ 0.7 *        | 31.4 $\pm$ 1.8 *         | 11.7 $\pm$ 0.5 *      | 10.4 $\pm$ 0.1                      | 2.5 $\pm$ 0.5       | 40.2 $\pm$ 1.4                         |
| 4C  | 28.2 $\pm$ 3.1 *        | 31.6 $\pm$ 2.1 *         | 12.0 $\pm$ 1.2 *      | 11.1 $\pm$ 0.1                      | 2.1 $\pm$ 0.3       | 35.6 $\pm$ 2.7 *                       |
| 8C  | 26.2 $\pm$ 1.5 *        | 32.0 $\pm$ 2.3 *         | 13.6 $\pm$ 1.1        | 13.5 $\pm$ 0.2 *                    | 2.8 $\pm$ 0.3 *     | 35.9 $\pm$ 2.5 *                       |
| 15C | 26.5 $\pm$ 0.7 *        | 30.8 $\pm$ 0.2 *         | 14.0 $\pm$ 0.7        | 12.0 $\pm$ 0.5                      | 2.7 $\pm$ 0.2 *     | 32.5 $\pm$ 5.2 *                       |
